# Supplementary material for: Hempseed (Cannabis sativa) Peptides WVSPLAGRT and IGFLIIWV Exert Anti-inflammatory Activity in the LPS-Stimulated Human Hepatic Cell Line
Source: PubMed Central journal article supplement (PMC8778635; doi:10.1021/acs.jafc.1c07520), 2022-01-10
Supplement: jf1c07520_si_001.pdf [file jf1c07520_si_001.pdf]

*Supplemental material*

**The hempseed (*C. sativa*) peptides WVSPLAGRT and IGFLIIWV exert anti-inflammatory activity in LPS stimulated human hepatic cell line**

Ivan Cruz-Chamorro <sup>a,b,†</sup>, Guillermo Santos-Sánchez <sup>a,b,†</sup>, Carlotta Bollati <sup>a</sup>, Martina Bartolomei <sup>a</sup>, Jianqiang Li <sup>a</sup>, Anna Arnoldi <sup>a</sup>, Carmen Lammi <sup>a,\*</sup>

<sup>a</sup>Department of Pharmaceutical Sciences, University of Milan, 20133 Milan, Italy. [carlotta.bollati@unimi.it](mailto:carlotta.bollati@unimi.it) (C.B.); [martina.bartolomei@unimi.it](mailto:martina.bartolomei@unimi.it) (M.B.); [anna.arnoldi@unimi.it](mailto:anna.arnoldi@unimi.it) (A.A.); [jianqiang.li@unimi.it](mailto:jianqiang.li@unimi.it) (J.L.); [carmen.lammi@unimi.it](mailto:carmen.lammi@unimi.it) (C.L.)

<sup>b</sup>Departamento de Bioquímica Médica y Biología Molecular e Inmunología, Universidad de Sevilla, 41009 Seville, Spain. [icruz-ibis@us.es](mailto:icruz-ibis@us.es) (I.C.-C.); [gsantos-ibis@us.es](mailto:gsantos-ibis@us.es) (G.S.-S.)

† These authors equally contributed to the work

\* Corresponding Author: Carmen Lammi, Department of Pharmaceutical Sciences, University of Milan, via Mangiagalli 25, 20133 Milan, Italy. E-mail: [carmen.lammi@unimi.it](mailto:carmen.lammi@unimi.it), tel.: +39 02-50319372.

**Reagents**

Dulbecco's modified Eagle's medium (DMEM), L-glutamine, fetal bovine serum (FBS), phosphate buffered saline (PBS), penicillin/streptomycin, chemiluminescent reagent, and 24 or 96-well plates were purchased from Euroclone (Milan, Italy). Bovine serum albumin (BSA), RIPA buffer was bought from Sigma-Aldrich (St. Louis, MO, USA). Phenylmethanesulfonyl fluoride (PMSF), Na-orthovanadate inhibitors were purchased from Santa Cruz Biotechnology Inc. (Santa Cruz, CA, USA). The inhibitor cocktail Complete Midi from Roche (Basel, Swiss). Mini protean TGX pre-cast gel 7.5%, and Mini nitrocellulose Transfer Packs were purchased from BioRad (Hercules, CA, USA).

**A**

Sample Name :H2  
 Sample ID :U7849GG260-7  
 Time Processed :2:30:08 AM  
 Month-Day-Year Processed :08/06/2021

Pump A : 0.065% trifluoroacetic in 100% water (v/v)  
 Pump B : 0.05% trifluoroacetic in 100% acetonitrile (v/v)  
 Total Flow: 1 ml/min  
 Wavelength: 220 nm

<<LC Time Program>>

| Time  | Module     | Command | Value |
|-------|------------|---------|-------|
| 0.01  | Pumps      | B Conc  | 5     |
| 25.00 | Pumps      | B Conc  | 65    |
| 25.01 | Pumps      | B Conc  | 95    |
| 27.00 | Pumps      | B Conc  | 95    |
| 27.01 | Pumps      | B Conc  | 5     |
| 35.00 | Pumps      | B Conc  | 5     |
| 35.01 | Controller | Stop    |       |

<<Column Performance>>

<Detector A>  
 Column : Inertsil ODS-3 4.6 x 250 mm  
 Equipment: ZJ21010026

<Chromatogram>

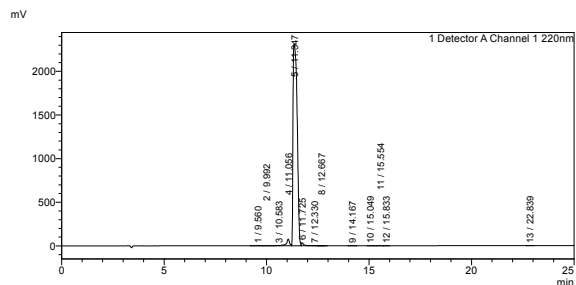

**C**

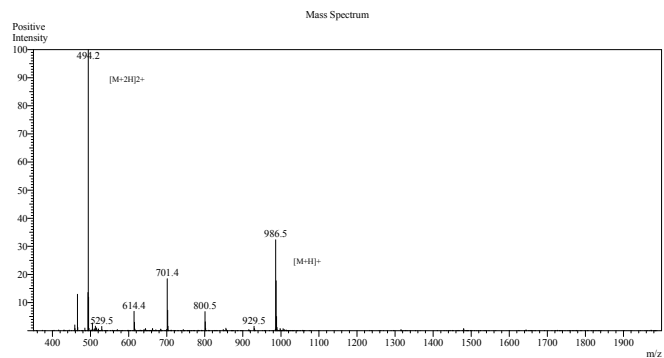

|                      |              |                     |           |                 |                 |
|----------------------|--------------|---------------------|-----------|-----------------|-----------------|
| Sample Information   | 08/05/21     | Interface           | ESI       | Equipment       | :ZJ21010035     |
| Month-Day Processed: | 18:52:35     | Nebulizing Gas Flow | :1.5L/min | Interface Bias  | :+4.5 kV        |
| Time Processed:      | 0.2          | CDI Temp            | :200      | Drying Gas Flow | :3.4 L/min      |
| Injection Volume:    | 0.2          | Block Temp          | :200      | T Flow          | :0.2 ml/min     |
| Sample Name:         | H2           |                     |           | B conc          | :50%H2O/50%MeOH |
| Sample ID:           | U7849GG260-7 |                     |           |                 |                 |
| Theoretical MW:      | 986.13       |                     |           |                 |                 |
| Observed MW:         | 986.4        |                     |           |                 |                 |

**B**

Sample Name :H3  
 Sample ID :U7849GG260-4  
 Time Processed :13:11:43  
 Month-Day-Year Processed :08/15/2021

Pump A : 0.065% trifluoroacetic in 100% water (v/v)  
 Pump B : 0.05% trifluoroacetic in 100% acetonitrile (v/v)  
 Total Flow: 1 ml/min  
 Wavelength: 220 nm

| Time  | Module     | Command       | Value |
|-------|------------|---------------|-------|
| 0.01  | Pumps      | Pump A.B Conc | 0     |
| 25.00 | Pumps      | Pump A.B Conc | 50    |
| 25.01 | Pumps      | Pump A.B Conc | 95    |
| 32.00 | Pumps      | Pump A.B Conc | 95    |
| 32.01 | Pumps      | Pump A.B Conc | 0     |
| 40.00 | Pumps      | Pump A.B Conc | 0     |
| 45.00 | Controller | Stop          |       |

<<Column Performance>>

<Detector A>  
 Column : Inertsil ODS-3 4.6 x 250 mm  
 Equipment: GK11010017

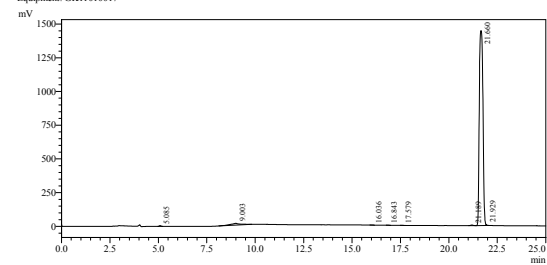

**D**

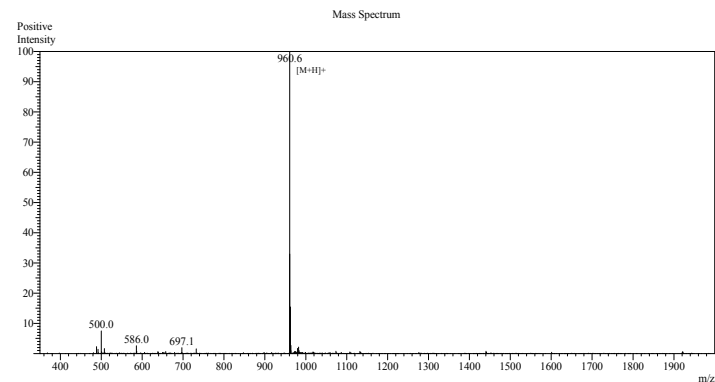

|                      |              |                     |           |                 |                 |
|----------------------|--------------|---------------------|-----------|-----------------|-----------------|
| Sample Information   | 08/12/21     | Interface           | ESI       | Equipment       | :ZJ21010035     |
| Month-Day Processed: | 9:55:15      | Nebulizing Gas Flow | :1.5L/min | Interface Bias  | :+4.5 kV        |
| Time Processed:      | 0.2          | CDI Temp            | :250      | Drying Gas Flow | :3 L/min        |
| Injection Volume:    | 0.2          | Block Temp          | :200      | T Flow          | :0.2 ml/min     |
| Sample Name:         | H3           |                     |           | B conc          | :50%H2O/50%MeOH |
| Sample ID:           | U7849GG260-4 |                     |           |                 |                 |
| Theoretical MW:      | 960.22       |                     |           |                 |                 |
| Observed MW:         | 959.6        |                     |           |                 |                 |

**Figure S1: Chromatogram and Mass Spectrum of H2 (A and C) and H3 (B and D)**

**Table S1.** Antibodies used in the Western Blot assays.

| <b>Name product</b>                                      | <b>Dilution</b> | <b>Supplier</b>                   |
|----------------------------------------------------------|-----------------|-----------------------------------|
| Anti-iNOS                                                | 1:1000          | Cell Signaling Technology (D6B6S) |
| Anti-NF-kappaB, p65 subunit, active subunit, clone 12H11 | 1:1000          | Sigma-Aldrich (MAB3026)           |
| Anti-phospho-NF-kappaB p65 (pSer276)                     | 1:1000          | Sigma-Aldrich (SAB4504488)        |
| Anti- $\beta$ -actin                                     | 1:16000         | Sigma-Aldrich (A5441)             |

Name of antibody, dilution used, and supplier. iNOS, inducible nitric oxide synthase; NF-kappaB, nuclear factor- $\kappa$ B.

**Table S2.** Absolute values of cytokine production.

| <b>Cytokine</b>       | <b>C</b>         | <b>LPS</b>       | <b>H2 [100 <math>\mu</math>M]</b> | <b>C</b>         | <b>LPS</b>       | <b>H3 [25 <math>\mu</math>M]</b> |
|-----------------------|------------------|------------------|-----------------------------------|------------------|------------------|----------------------------------|
| IFN- $\gamma$ (pg/mL) | 25.50 $\pm$ 5.04 | 34.12 $\pm$ 5.94 | 26.00 $\pm$ 1.41                  | 28.28 $\pm$ 1.28 | 30.35 $\pm$ 0.35 | 26.50 $\pm$ 0.58                 |
| TNF (pg/mL)           | 33.71 $\pm$ 1.21 | 38.00 $\pm$ 2.94 | 32.00 $\pm$ 1.41                  | 33.89 $\pm$ 0.75 | 36.68 $\pm$ 0.43 | 29.83 $\pm$ 1.17                 |
| IL-6 (ng/mL)          | 1329 $\pm$ 8.60  | 1448 $\pm$ 1.23  | 1470 $\pm$ 5.02                   | 603.8 $\pm$ 1.71 | 672.5 $\pm$ 2.38 | 584.8 $\pm$ 19.16                |
| IL-10 (pg/mL)         | 21.68 $\pm$ 0.22 | 20.98 $\pm$ 1.32 | 23.25 $\pm$ 0.13                  | 48.90 $\pm$ 0.36 | 49.74 $\pm$ 1.43 | 61.88 $\pm$ 0.17                 |

Mean  $\pm$  standard deviation (SD) of the cytokines production. C, unstimulated control group; LPS, lipopolysaccharide-stimulated cells; H, hempseed peptide; IFN- $\gamma$ , interferon- $\gamma$ ; TNF, tumor necrosis factor; IL, interleukin.
